# Supplementary material
Source: PubMed Central journal article supplement (PMC3630359)

# Fig5D

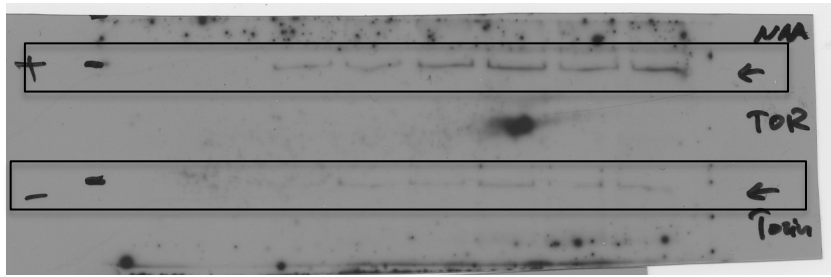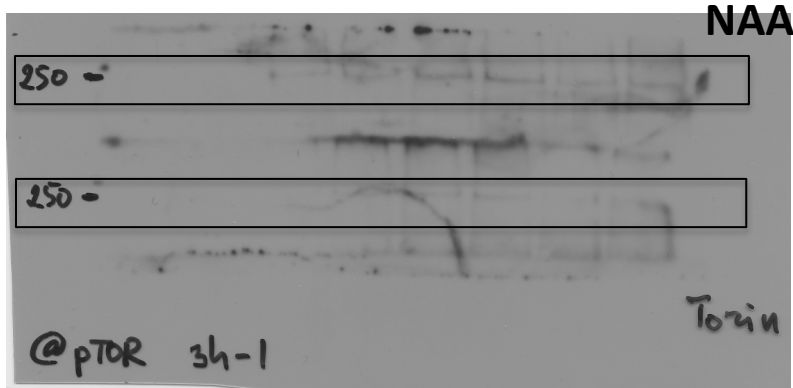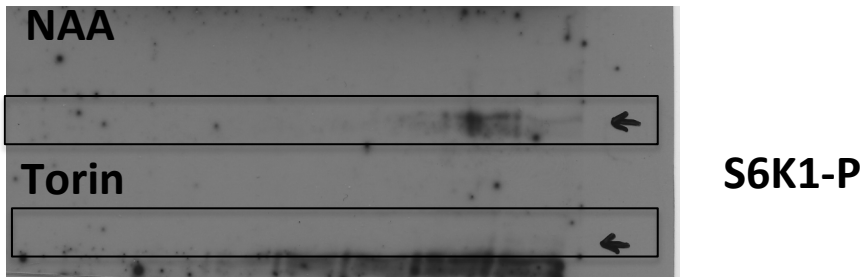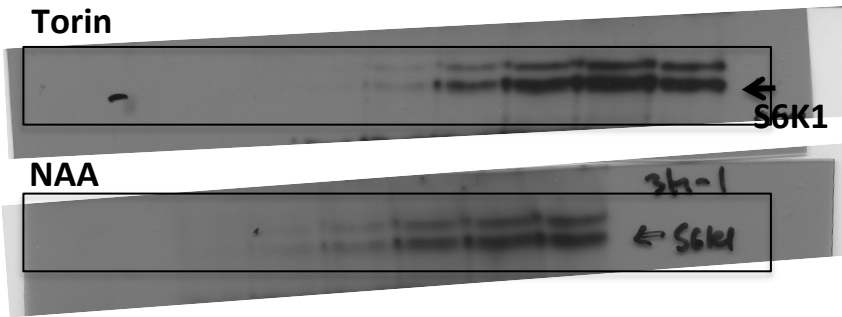

Supplement: emboj201361df5d.pdf [file emboj201361df5d.pdf]
